# Supplementary material for: Bioactive Lipid O-cyclic phytosphingosine-1-phosphate Promotes Differentiation of Human Embryonic Stem Cells into Cardiomyocytes via ALK3/BMPR Signaling
Source: MDPI journal article supplement (doi:10.3390/ijms22137015), 2021-06-29

## Supplementary Figures

### **Bioactive lipid o-cyclic phytosphingosine-1-phosphate promotes differentiation of human embryonic stem cells into cardiomyocytes via ALK3/BMPR signaling**

Ji-Hye Jang<sup>1\*</sup>, Min-Seong Kim<sup>1\*</sup>, Ainsley Mike Antao<sup>1</sup>, Won-Jun Jo<sup>1</sup>, Hyung-Joon Kim<sup>1</sup>,  
Su-Jin Kim<sup>3</sup>, Myeong Jun Choi<sup>3</sup>, Suresh Ramakrishna<sup>1,†</sup> and Kye-Seong Kim<sup>1,2,†</sup>

<sup>1</sup>Department of Biomedical Science, Graduate School of Biomedical Science and Engineering, Hanyang University, Seoul, Republic of Korea

<sup>2</sup>Department of Anatomy and Cell Biology, College of Medicine, Hanyang University, Seoul, Republic of Korea

<sup>3</sup>Axceso Biopharma Co., Ltd., Yongin, Gyeonggi-do, Republic of Korea

\*These authors contributed equally to this work.

Running Title: *cP1P induces ALK3/BMPR signaling during cardiomyocyte differentiation*

<sup>†</sup>Correspondence:

Suresh Ramakrishna (E-mail: [suri28@hanyang.ac.kr](mailto:suri28@hanyang.ac.kr), [suresh.ramkris@gmail.com](mailto:suresh.ramkris@gmail.com))

Kye-Seong Kim (E-mail: [ks66kim@hanyang.ac.kr](mailto:ks66kim@hanyang.ac.kr))

## **Table of Contents**

**FIGURE S1.** Chemical structures of cP1P and S1P.

**FIGURE S2.** Optimization of CHIR concentration for efficient mesoderm induction.

**FIGURE S3.** Characterization of hESC-derived cardiac differentiation.

**FIGURE S4.** Immunoblots to analyze the expression profiles of key signaling pathway intermediates during cardiac differentiation.

**FIGURE S5.** The original uncropped images for immunoblots in the main figures.

**SUPPLEMENTARY VIDEO S1:** Movie representing the beating CM clusters at day 6 in DMSO treated control group.

**SUPPLEMENTARY VIDEO S2:** Movie representing the beating CM clusters at day 6 in cP1P treated group.

**SUPPLEMENTARY VIDEO S3:** Movie representing the beating CM clusters at day 8 in DMSO treated control group.

**SUPPLEMENTARY VIDEO S4:** Movie representing the beating CM clusters at day 8 in cP1P treated group.

**SUPPLEMENTARY VIDEO S5:** Movie representing the beating CM clusters at day 8 in control groups treated with VPC between days 3-5 of differentiation.

**SUPPLEMENTARY VIDEO S6:** Movie representing the beating CM clusters at day 8 in cP1P group treated with VPC between days 3-5 of differentiation.

**SUPPLEMENTARY VIDEO S7:** Movie representing the beating CM clusters at day 8 in control groups treated with LDN between days 3-5 of differentiation.

**SUPPLEMENTARY VIDEO S8:** Movie representing the beating CM clusters at day 8 in cP1P group treated with LDN between days 3-5 of differentiation.

**SUPPLEMENTARY FIGURE S1.** Chemical structures of cP1P and S1P.

**A**

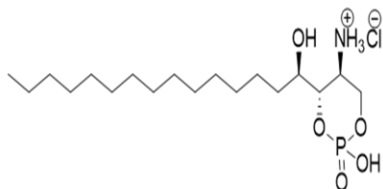

**cyclic Phytosphingosine-1-phosphate**

**B**

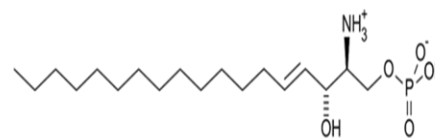

**Sphingosine-1-phosphate**

**SUPPLEMENTARY FIGURE S1:** Chemical structures of **(A)** cP1P and **(B)** S1P.

**SUPPLEMENTARY FIGURE S2.** Optimization of CHIR concentration for efficient mesoderm induction.

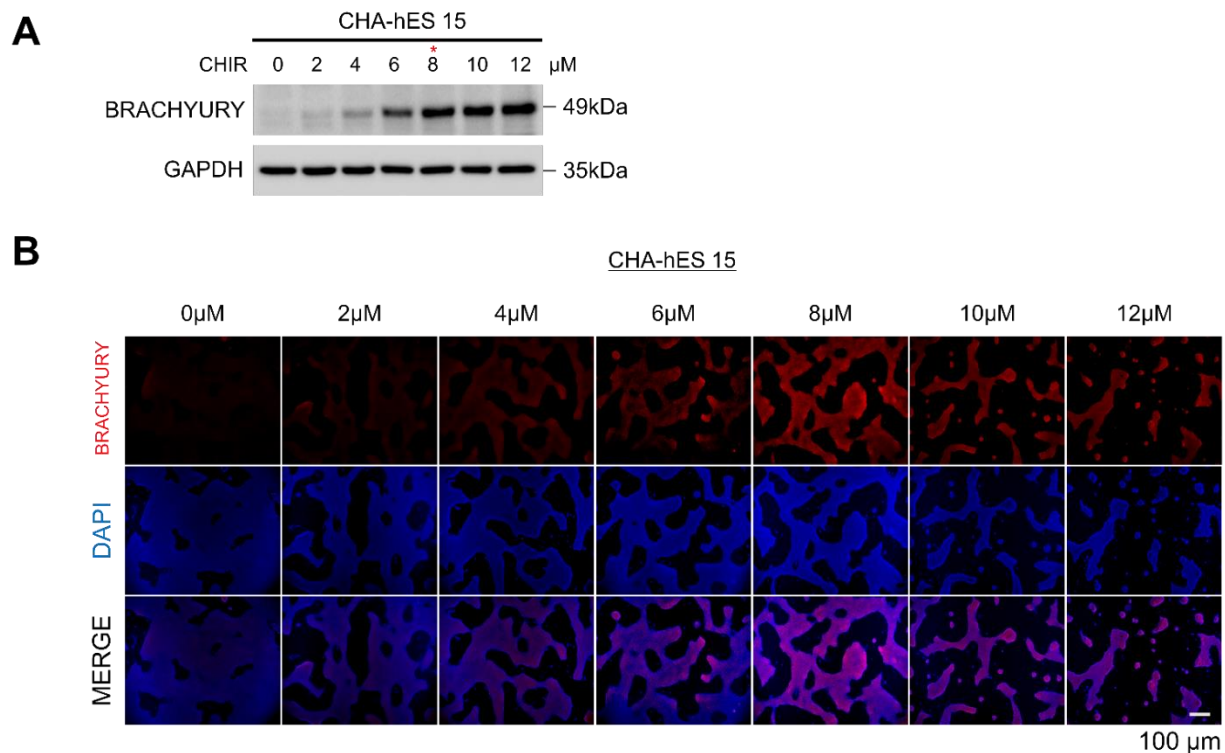

**SUPPLEMENTARY FIGURE S2:** Optimization of CHIR concentration for efficient mesoderm induction. **(A)** Immunoblotting and **(B)** immunofluorescence analysis for the mesodermal marker BRACHYURY were conducted at a range of CHIR concentrations (0-12  $\mu$ M) in hESCs at day 1 of mesodermal induction, Scale bar, 100  $\mu$ m.

**SUPPLEMENTARY FIGURE S3.** Characterization of hESC-derived cardiac differentiation.

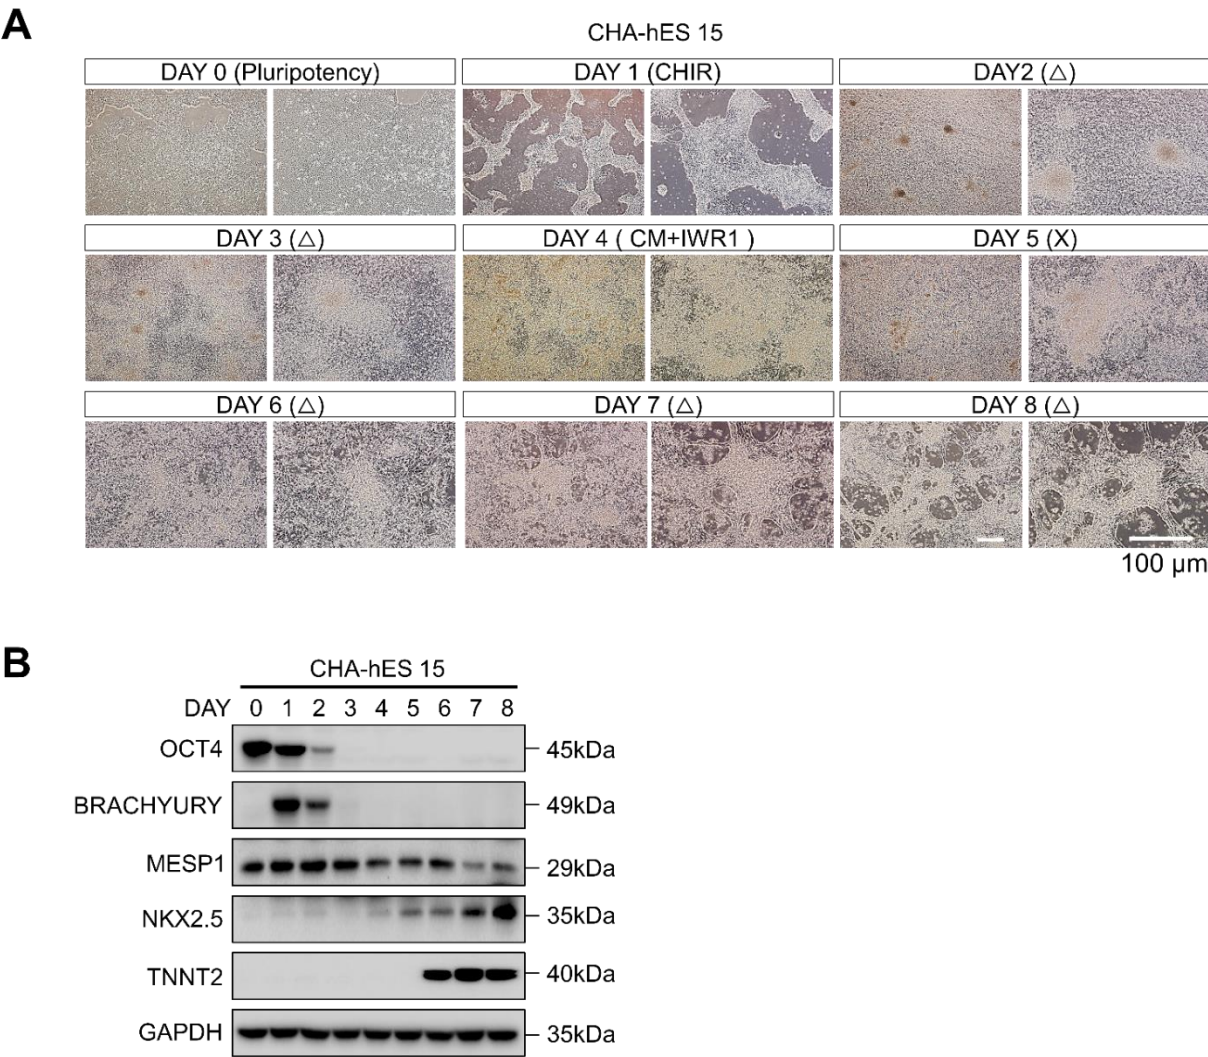

**SUPPLEMENTARY FIGURE S3:** Characterization of hESC-derived cardiac differentiation. **(A)** Phenotypic overview of hESC-derived CMs during cardiac differentiation from days 0 to 8. Differentiation started when the confluence of hESCs reached 80–90% (Day 0). The morphology of the hESCs were analyzed visually to identify homogeneous colonies with clear borders that showed no obvious differentiating zones. hESCs were treated with 8 μM CHIR for 24 h on day 1 followed by treatment with IWR1

on day 3 for 48 hours. Beating islands of cardiomyocytes were observed to cover maximum spaces by the 8<sup>th</sup> day of differentiation. Pictures were taken using an Olympus IX71 inverted microscope equipped with an Olympus DP70-IFAD camera. Scale bars=100  $\mu$ m. **(B)** Immunoblots for the expressions of specific proteins during different stages of cardiac differentiation.

**SUPPLEMENTARY FIGURE S4.** Immunoblots to analyze the expression profiles of key signaling pathway intermediates during cardiac differentiation.

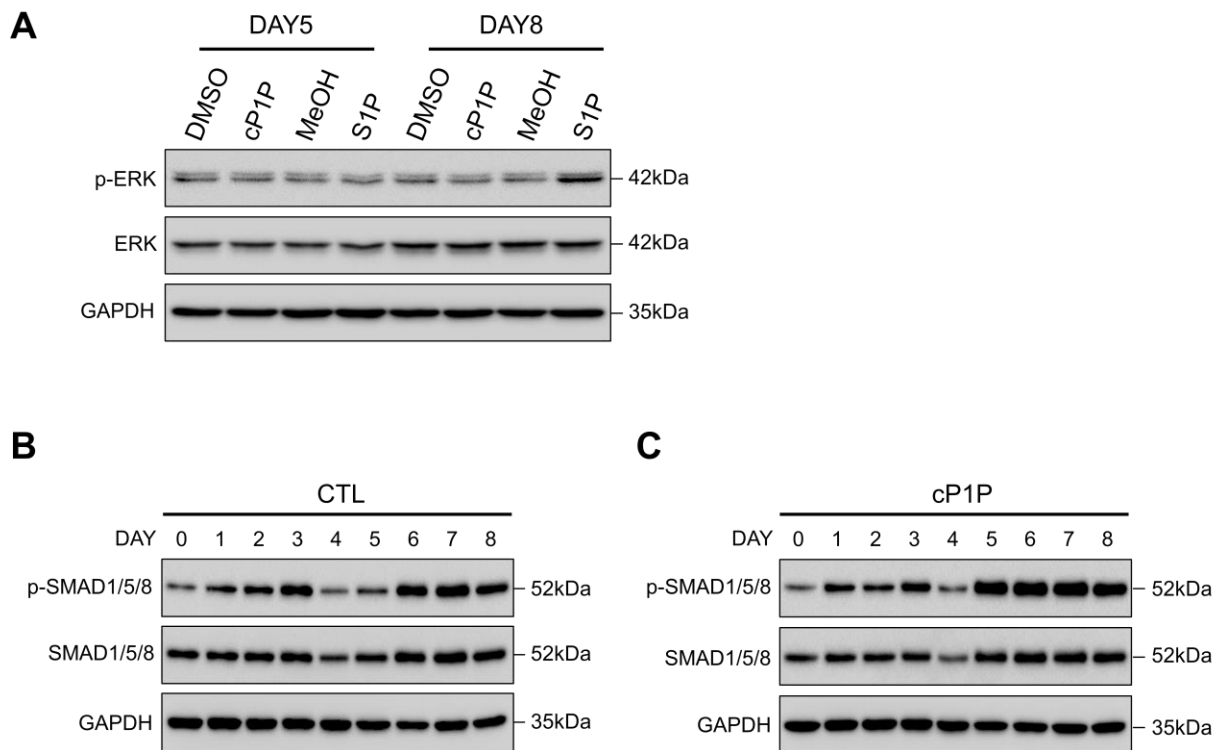

**SUPPLEMENTARY FIGURE S4:** Immunoblots to analyze the expression profiles of key signaling pathway intermediates during cardiac differentiation. **(A)** Immunoblot to analyze the ERK signaling pathway upon the treatment with cP1P or S1P at days 5 and 8 of cardiac differentiation. Immunoblot to analyze the SMAD signaling pathway upon the treatment with **(B)** DMSO and **(C)** cP1P during different stages of cardiac differentiation.

**SUPPLEMENTARY FIGURE S5.** The original uncropped images for immunoblots in the main figures.

**Figure 1B.**

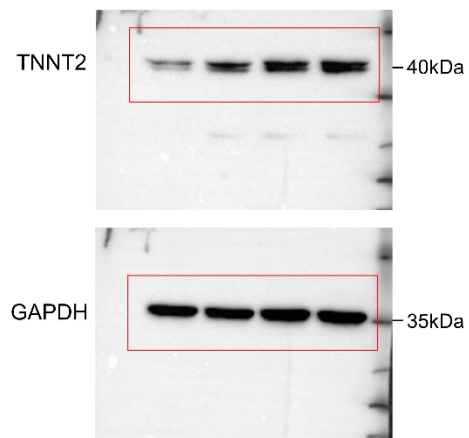

**Figure 2E.**

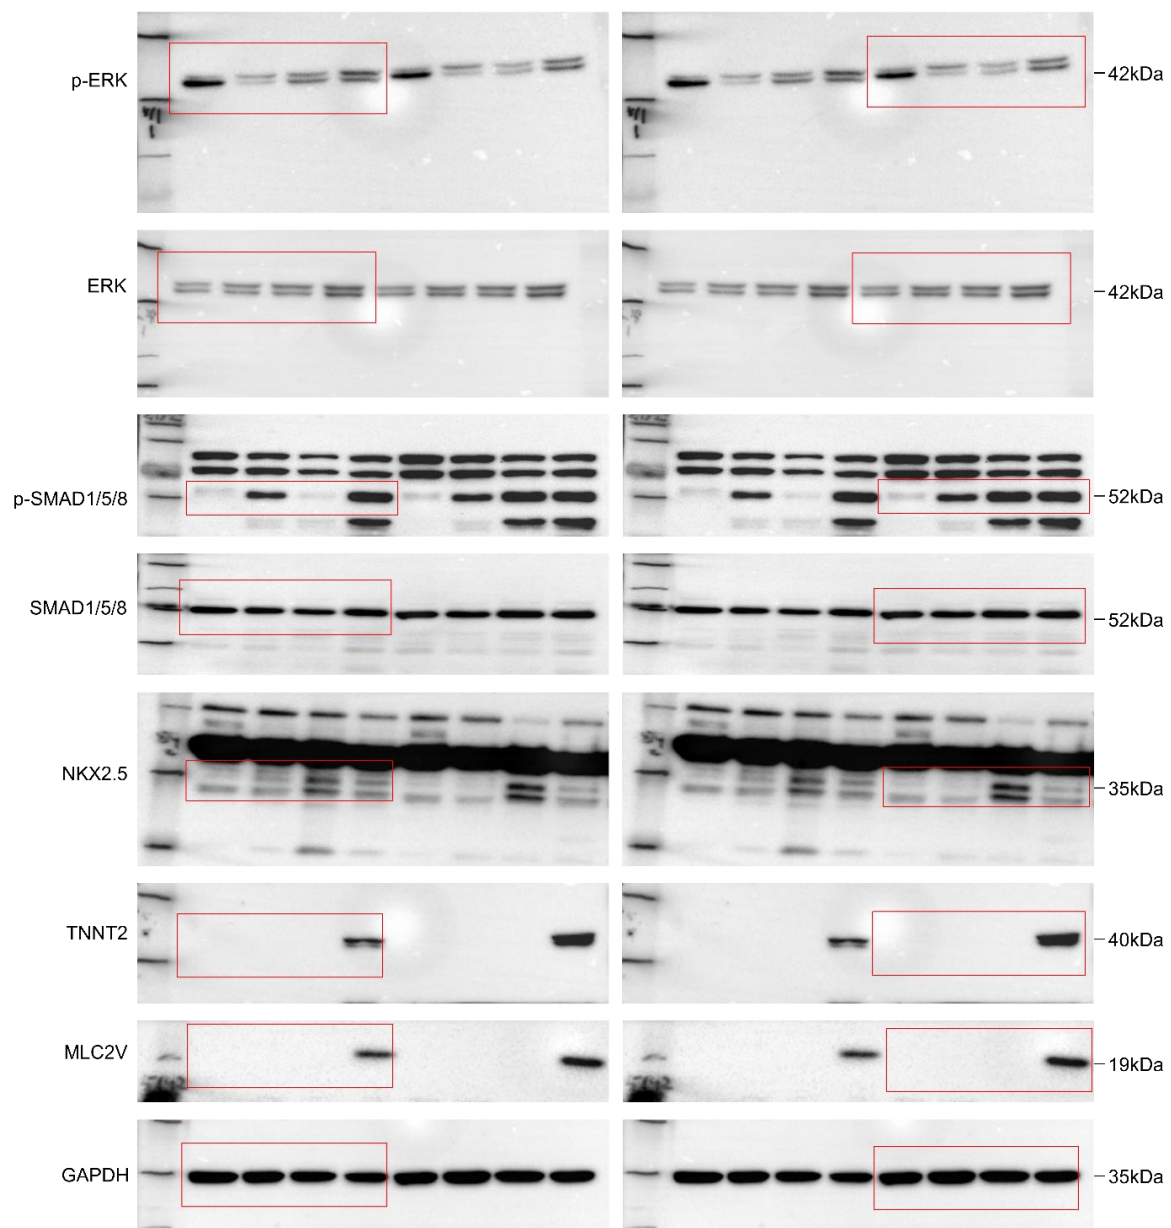

**Figure 3A.**

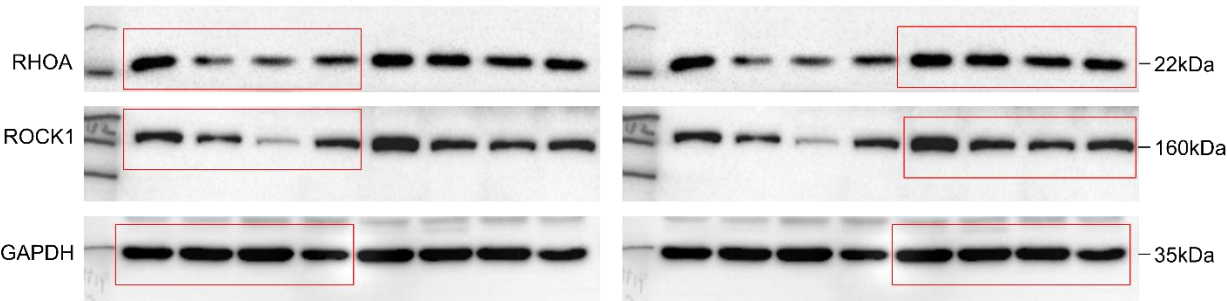

**Figure 3C**

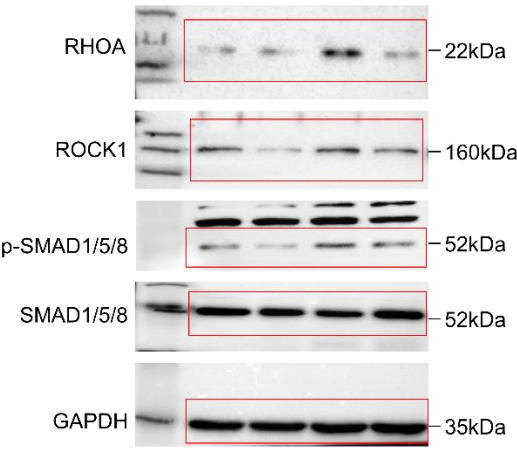

**Figure 3D.**

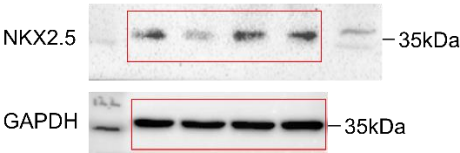

**Figure 3E.**

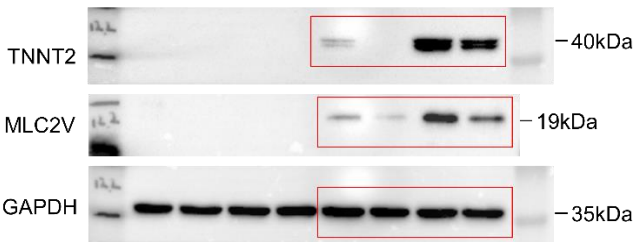

**Figure 3G.**

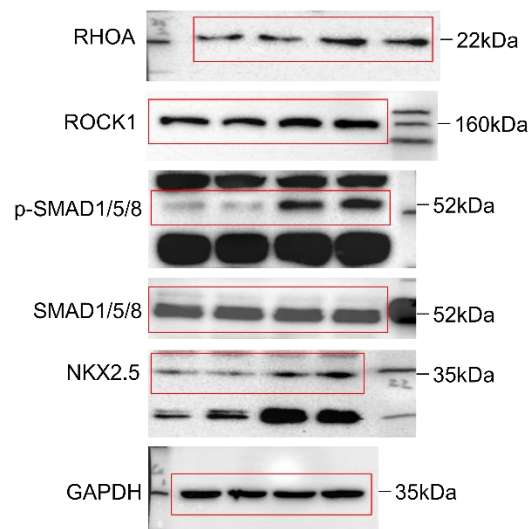

**Figure 3H**

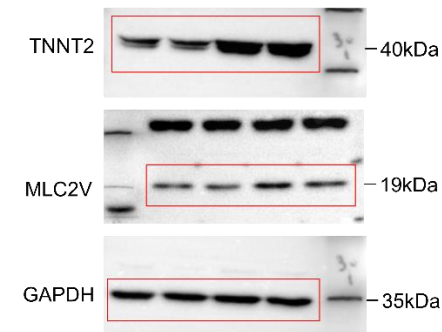

**Figure 4A.**

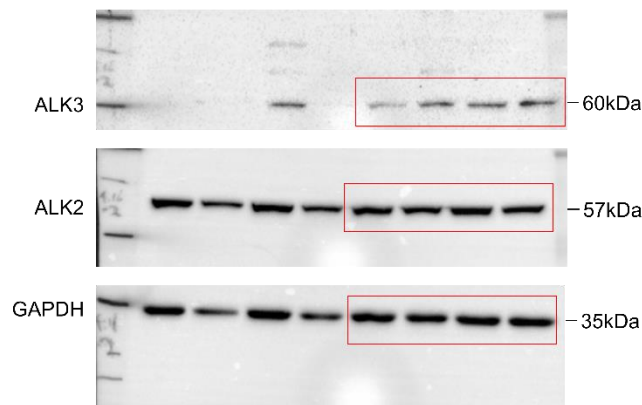

**Figure 4C**

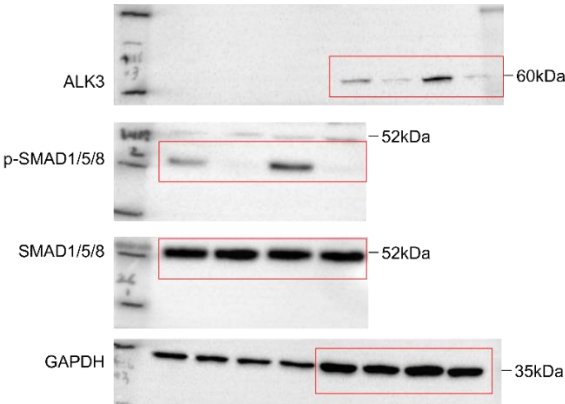

**Figure 4D**

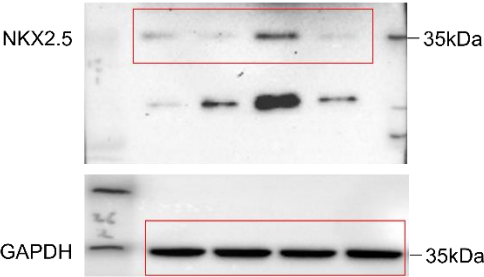

**Figure 4E.**

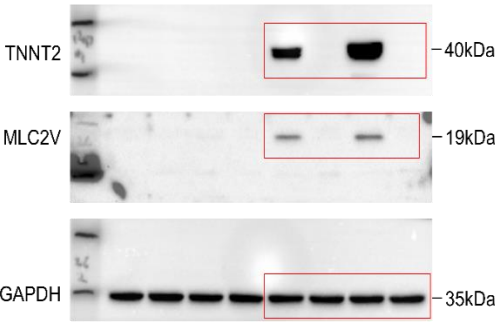

**Figure 4G.**

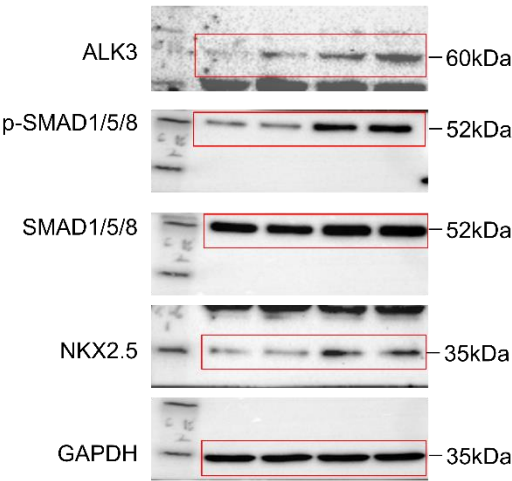

**Figure 4H.**

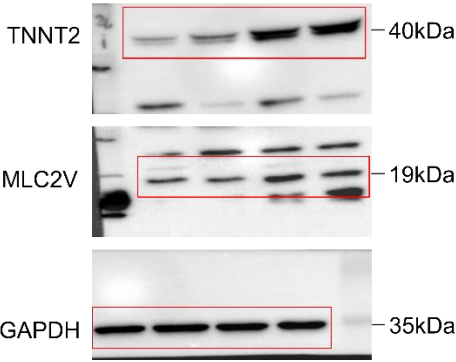

Supplement: s1 [file s1]
