# Supplementary material for: Bioactive Lipid O-cyclic phytosphingosine-1-phosphate Promotes Differentiation of Human Embryonic Stem Cells into Cardiomyocytes via ALK3/BMPR Signaling
Source: Int J Mol Sci. 2021 Jun 29;22(13):7015. doi: 10.3390/ijms22137015 (PMC8267745; doi:10.3390/ijms22137015)
Supplement: Supplementary file 1 [file ijms-22-07015-s001.zip]

Archive with 9 entries (9 files):
- Supplementary videos/Supplementary video S1.wmv
- Supplementary videos/Supplementary video S2.wmv
- Supplementary videos/Supplementary video S3.wmv
- Supplementary videos/Supplementary video S4.wmv
- Supplementary videos/Supplementary video S5.wmv
- Supplementary videos/Supplementary video S6.wmv
- Supplementary videos/Supplementary video S7.wmv
- Supplementary videos/Supplementary video S8.wmv
- ijms-1249650 supplementary.pdf
